# Supplementary material for: Adoptive transfer of CMV-specific TCR-T cells for the treatment of CMV infection after haploidentical hematopoietic stem cell transplantation
Source: PubMed Central journal article supplement — J Immunother Cancer. 2024 Jan 6;12(1):e007735. doi: 10.1136/jitc-2023-007735 (PMC10773422; doi:10.1136/jitc-2023-007735), 2024-01-06

## Supplementary Figure 1. Strategies of CMV-specific TCRs identification

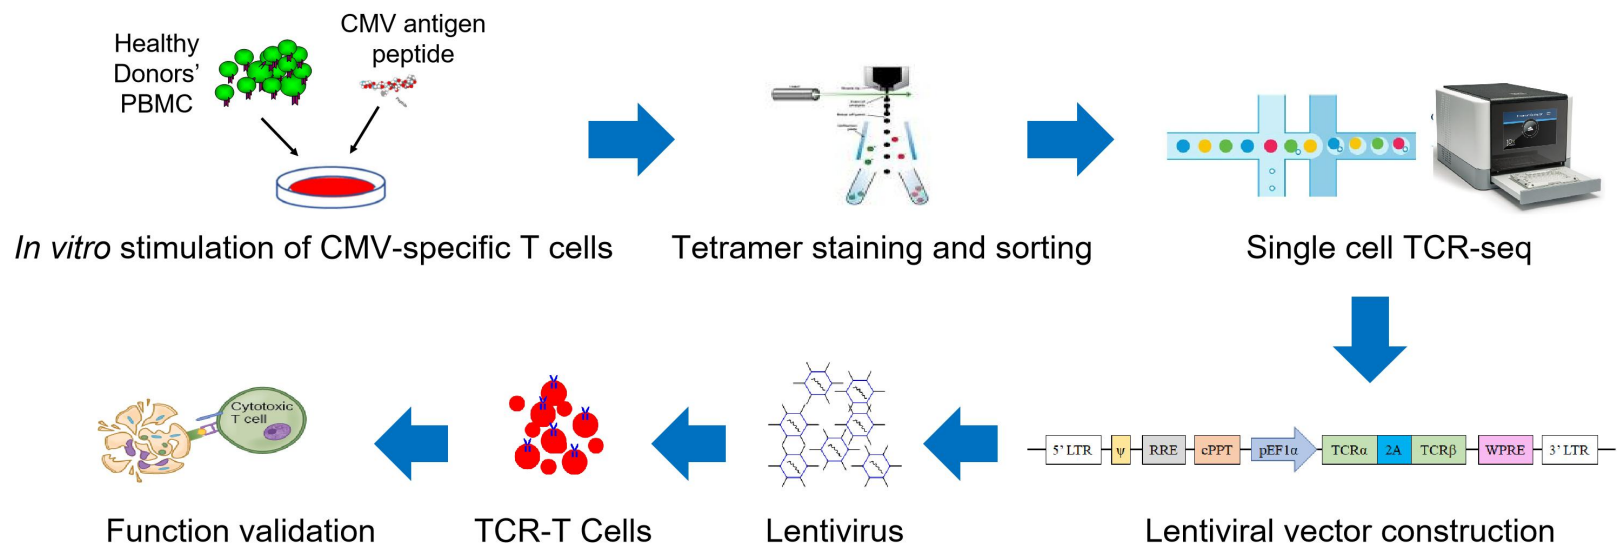

Supplementary Figure 2. Representative flow cytometry figures for *in vitro* cytotoxicity assay.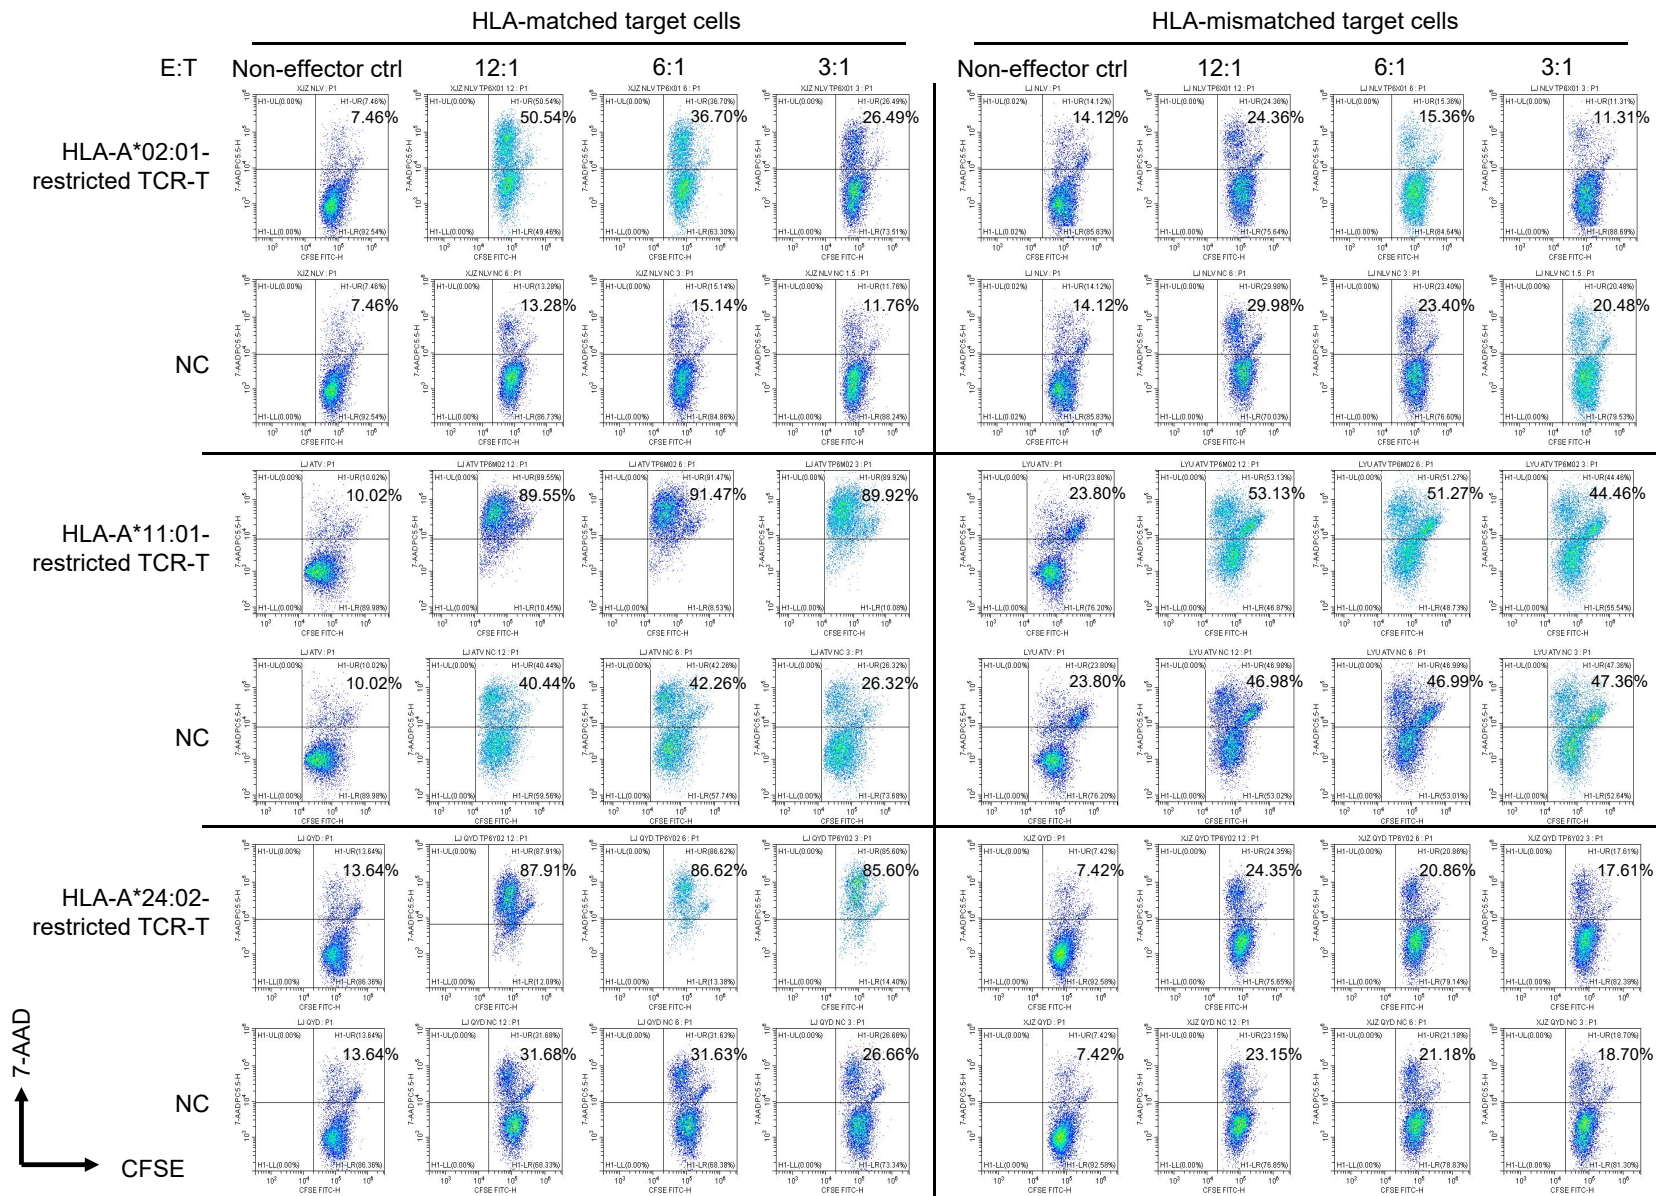

## Supplementary Figure 3. Flow cytometry figures for the infused CMV-TCR-T cells.

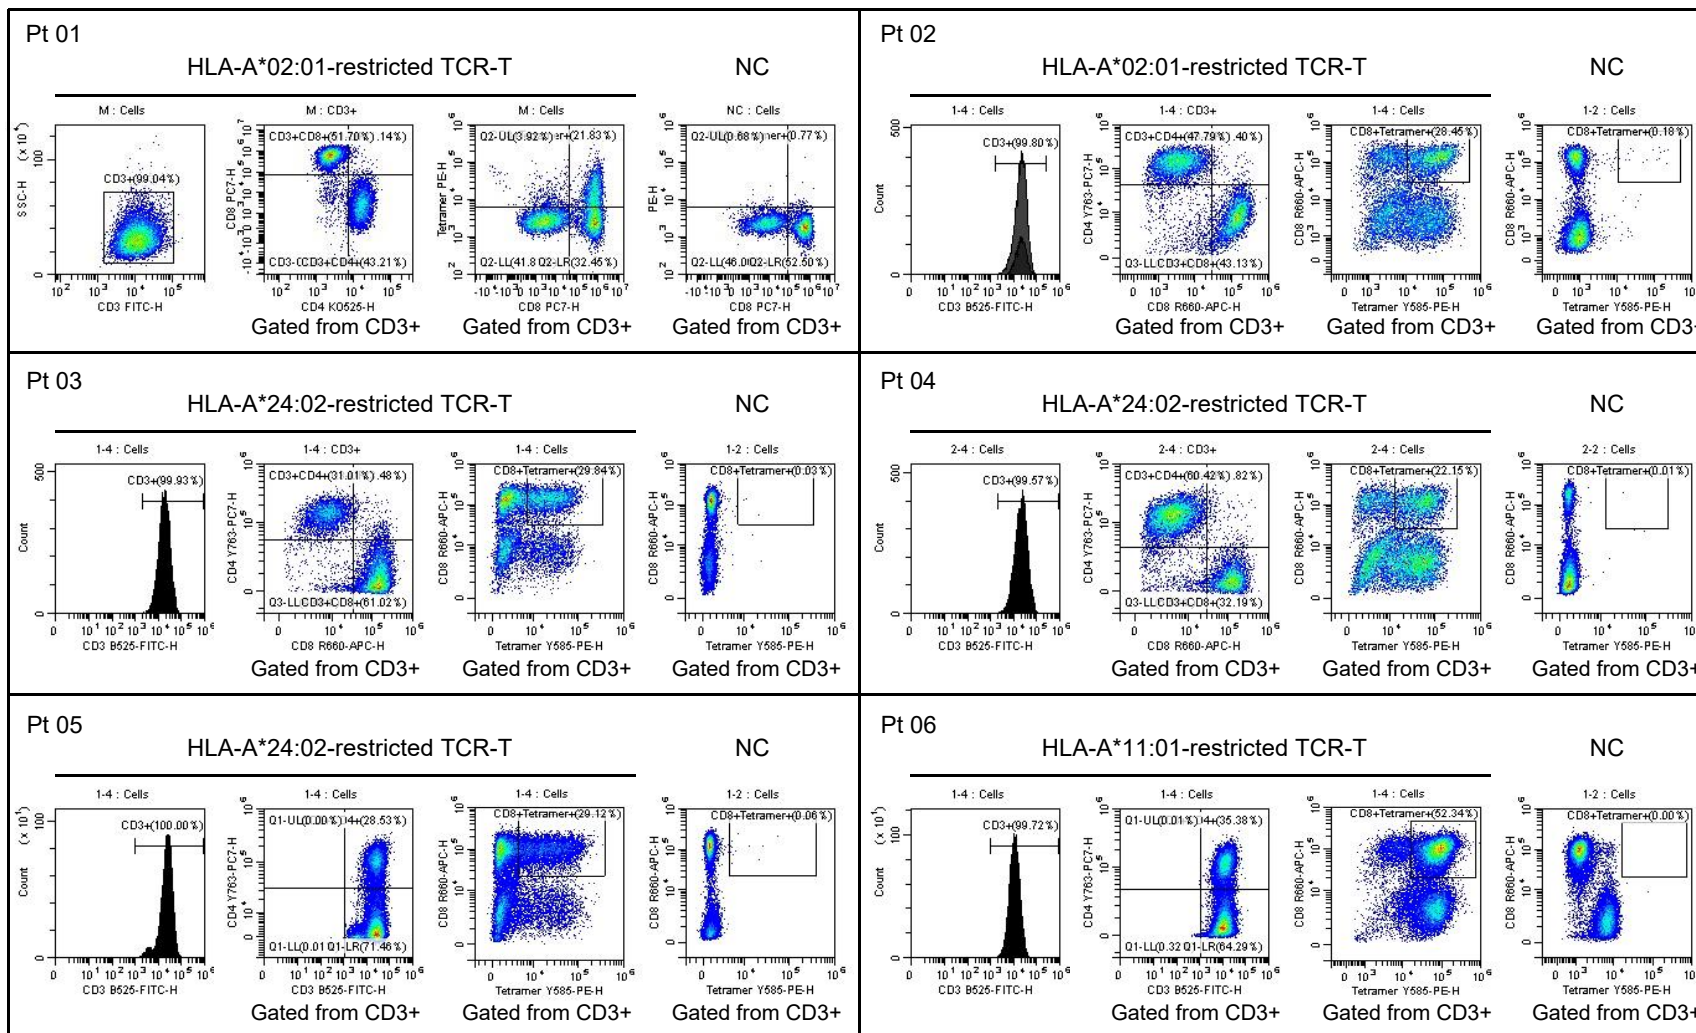

## Supplementary Figure 4. Clone frequencies of the infused TCR-T cells.

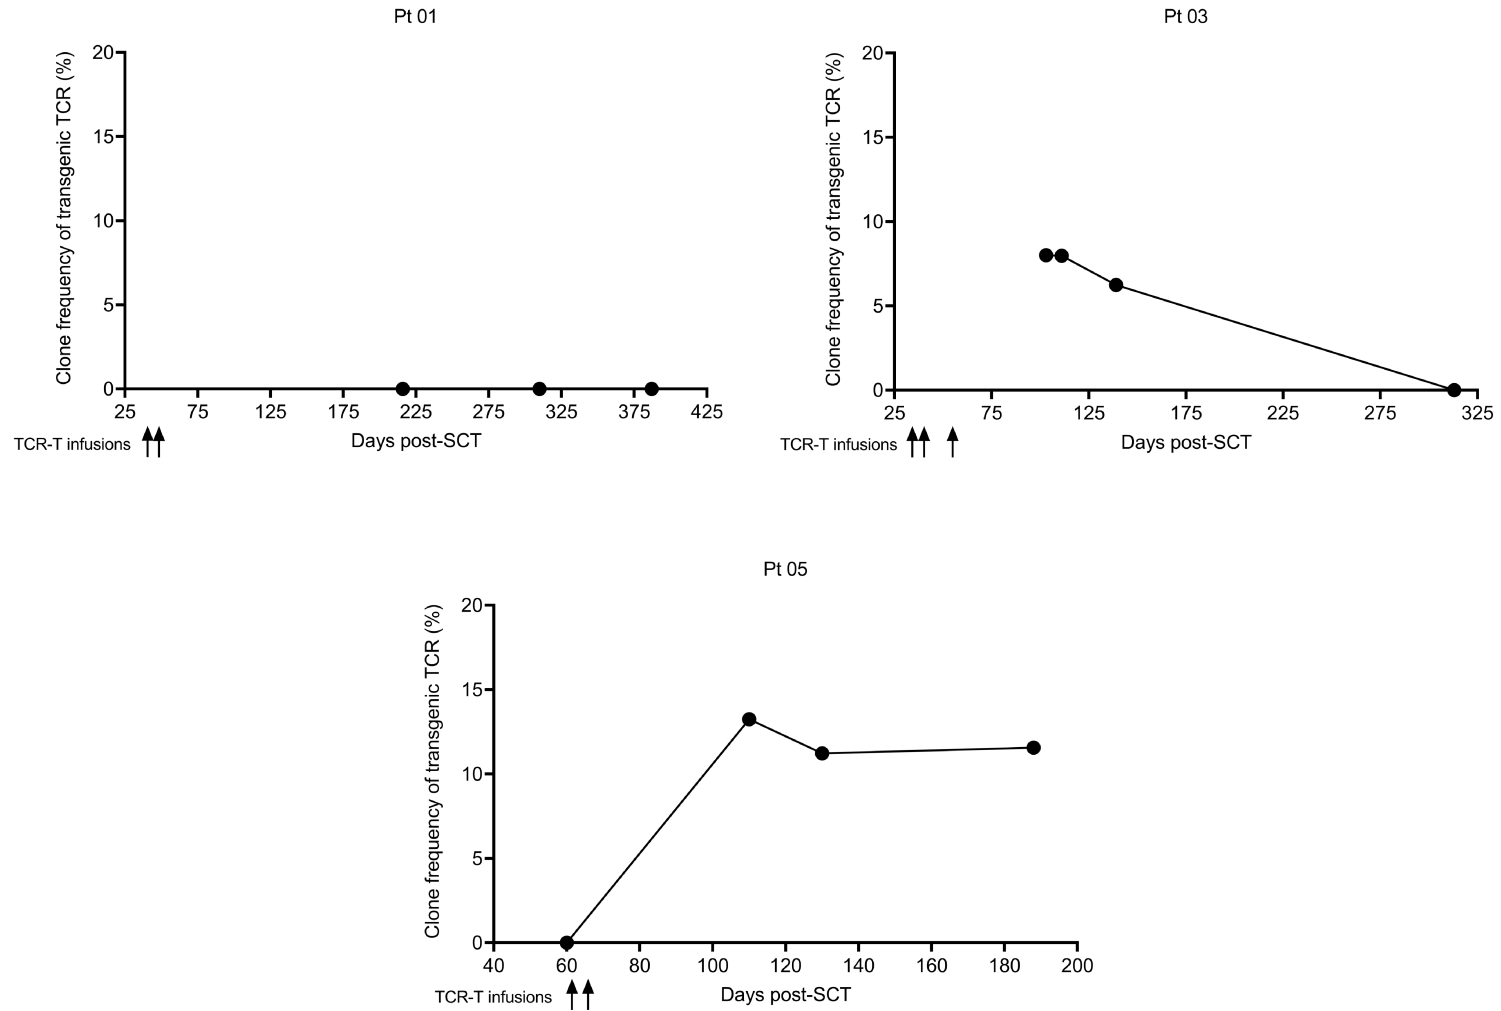

Supplement: jitc-2023-007735supp002.pdf [file jitc-2023-007735supp002.pdf]
